# Supplementary material
Source: publisher figshare collection journal article supplement (https://asha.figshare.com/ndownloader/files/17387357)
Supplement: Supplementary file 1 [file 17387357]

## Sheet: Sheet1
Supplemental material, Guo et al., “Percent Grammatical Utterances Between 4 and 9 Years of Age for the Edmonton Narrative Norms Instrument: Reference Data and Psychometric Properties,” AJSLP, https://doi.org/10.1044/2019_AJSLP-18-0228
Supplemental Material S4. Z score and confidence interval calculation table for percent grammatical utterances.
Please enter the PGU raw score in percentage, not proportion, into the cell (marked in red) based on the child's age
4-Year-Olds
		PGU
	Mean	0.7882
	SD	0.1487
	90% CI Upper Limit	0.739
	90% CI Lower Limit	0.5042
	95% CI Upper Limit	0.762
	95% CI Lower Limit	0.4812
PGU
RAW SCORE	z-score
0.6216	-1.12038
5-Year-Olds
		PGU
	Mean	0.8381
	SD	0.1503
	90% CI Upper Limit	0.755
	90% CI Lower Limit	0.5516
	95% CI Upper Limit	0.7748
	95% CI Lower Limit	0.5318
PGU
RAW SCORE	z-score
0.6533	-1.22954
6-Year-Olds
		PGU
	Mean	0.9064
	SD	0.066
	90% CI Upper Limit	0.8082
	90% CI Lower Limit	0.6342
	95% CI Upper Limit	0.8252
	95% CI Lower Limit	0.6172
PGU
RAW SCORE	z-score
0.7212	-2.80606
7-Year-Olds
		PGU
	Mean	0.9186
	SD	0.0589
	90% CI Upper Limit	0.7463
	90% CI Lower Limit	0.6167
	95% CI Upper Limit	0.7589
	95% CI Lower Limit	0.6041
PGU
RAW SCORE	z-score
0.6815	-4.02547
8-Year-Olds
		PGU
	Mean	0.9494
	SD	0.0348
	90% CI Upper Limit	0.7058
	90% CI Lower Limit	0.5966
	95% CI Upper Limit	0.7164
	95% CI Lower Limit	0.586
PGU
RAW SCORE	z-score
0.6512	-8.56897
9-Year-Olds
		PGU
	Mean	0.938
	SD	0.0425
	90% CI Upper Limit	0.7576
	90% CI Lower Limit	0.65
	95% CI Upper Limit	0.7681
	95% CI Lower Limit	0.6395
PGU
RAW SCORE	z-score
0.7038	-5.51059
